# Supplementary material for: Who’s Driving? Switch of Drivers in Immunotherapy-Treated Progressing Sinonasal Melanoma
Source: MDPI journal article supplement (doi:10.3390/cancers13112725), 2021-05-31
Supplement: s1 [file s1]

**Supplementary Appendix**

**Table of content**

Figure S1..... p.2

Figure S2..... p.3

Figure S3..... p.4

Figure S4..... p.5

Table S1..... p.6

Table S2..... p.7

Table S3..... p.8

Table S4..... p.9

Table S5..... p.11

Table S6..... p.11

Table S7..... p.11

Figure S1

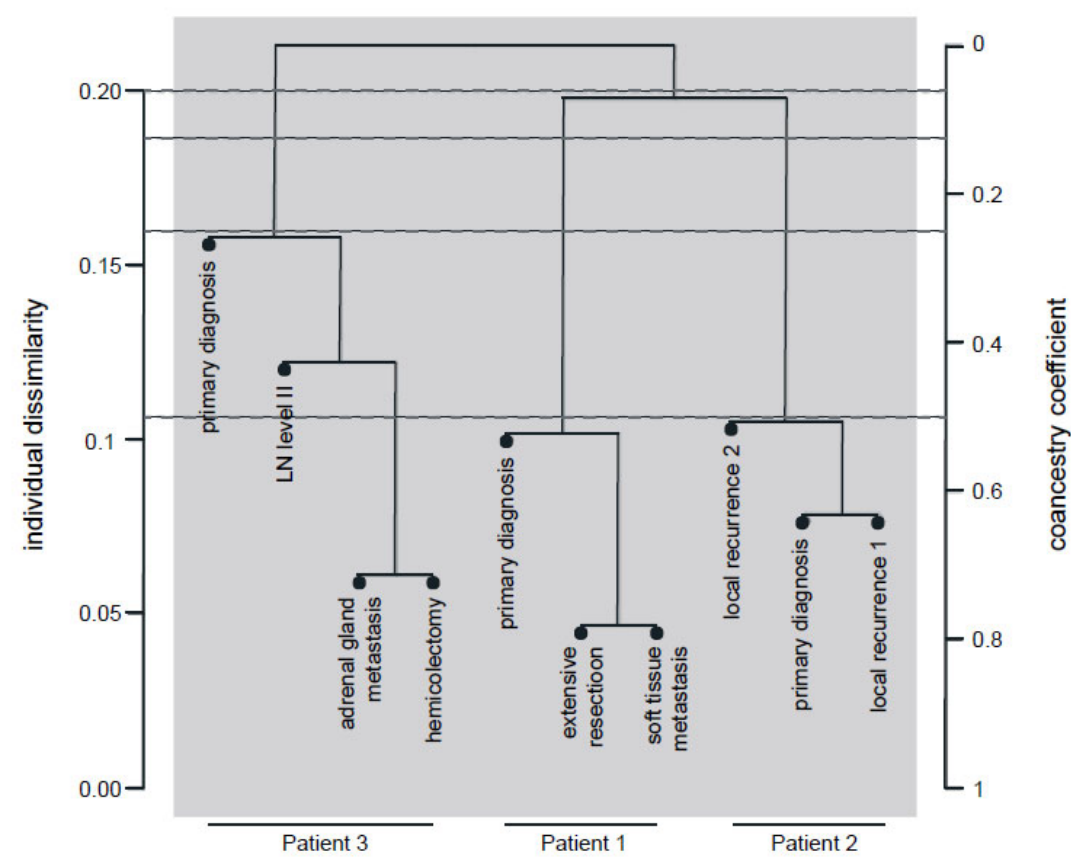

Figure S1: Individual dissimilarity and co-ancestry coefficient of all resected tumors from all patients.

Figure S2

A

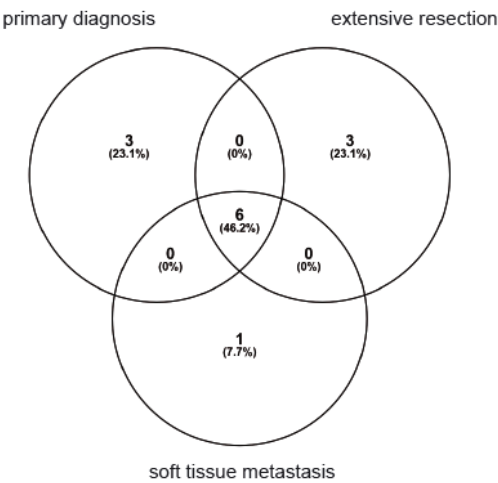

B

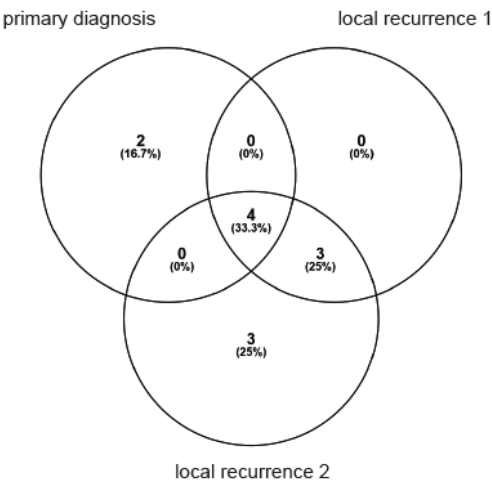

C

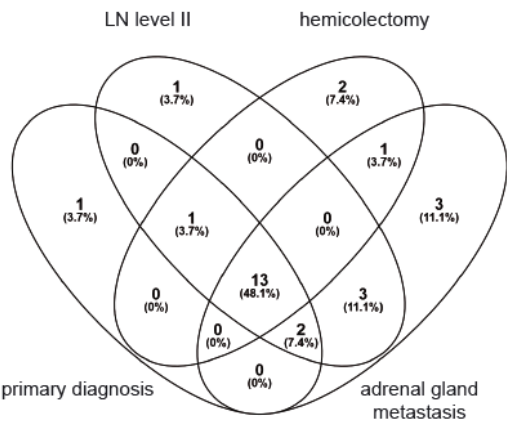

D

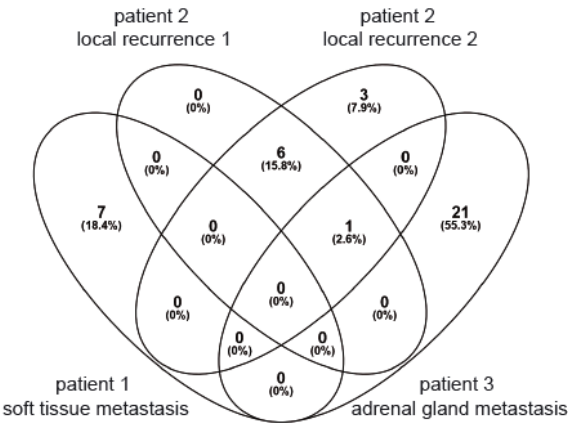

Figure S2: Overlap of mutations of the different tumor manifestations within each patient and of the *NRAS* mutant tumors. A) patient 1, B) patient 2, C) patient 3, D) overlap of mutations of *NRAS* mutant tumors of the three patients. LN: lymph node

Figure S3

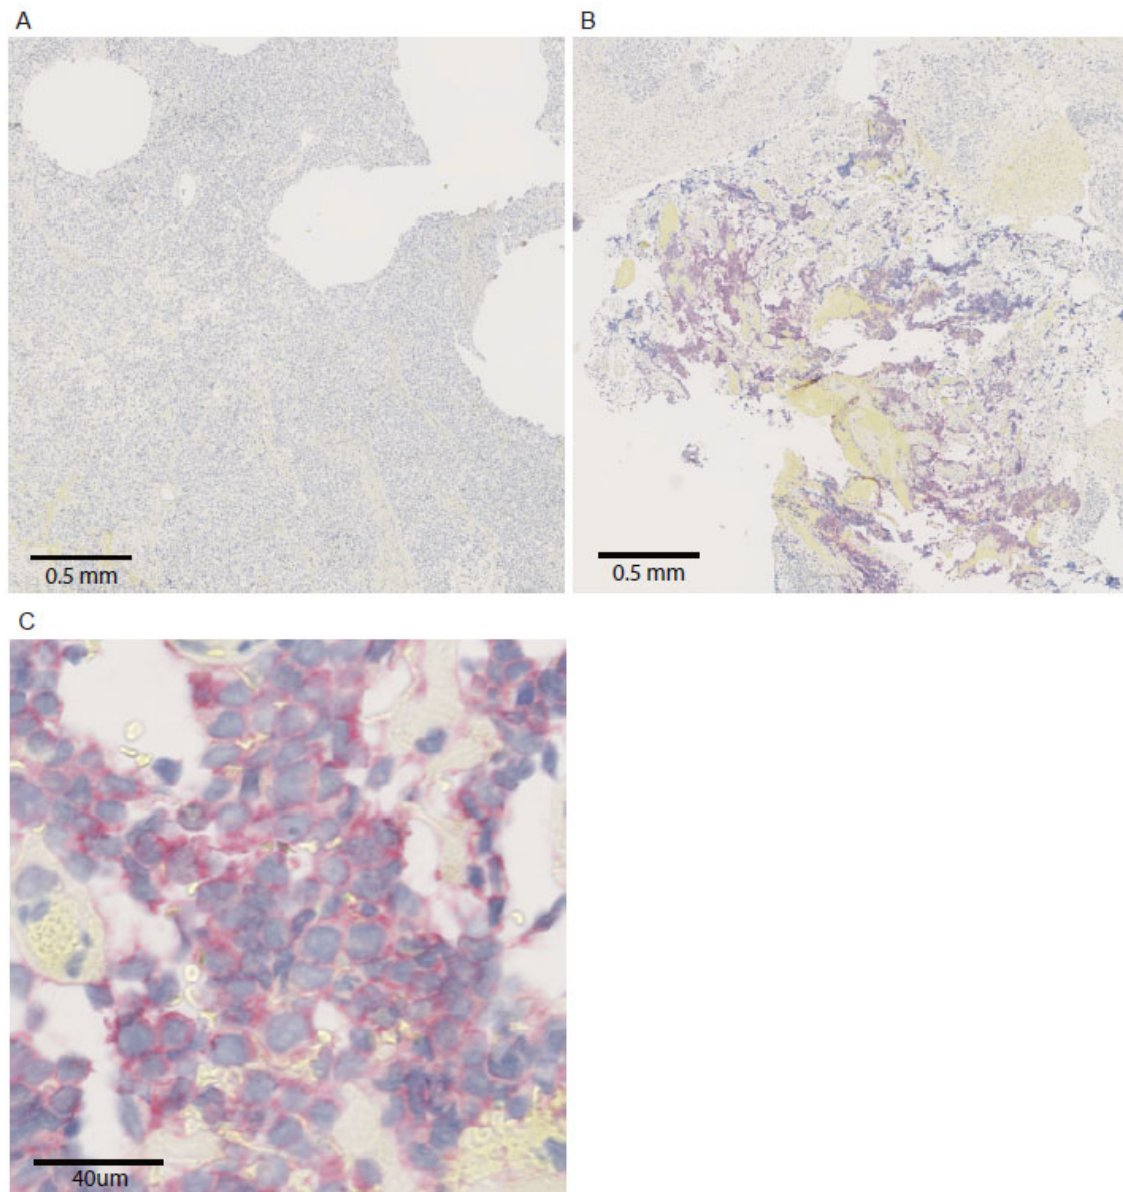

Figure S3: NRAS Q61R staining of the primary tumor of patient 1. A) Overview of the *KIT* mutant region, B) overview of the *NRAS* mutant region, C) higher magnification of the *NRAS* mutant region. Scale bar: 40um

Figure S4

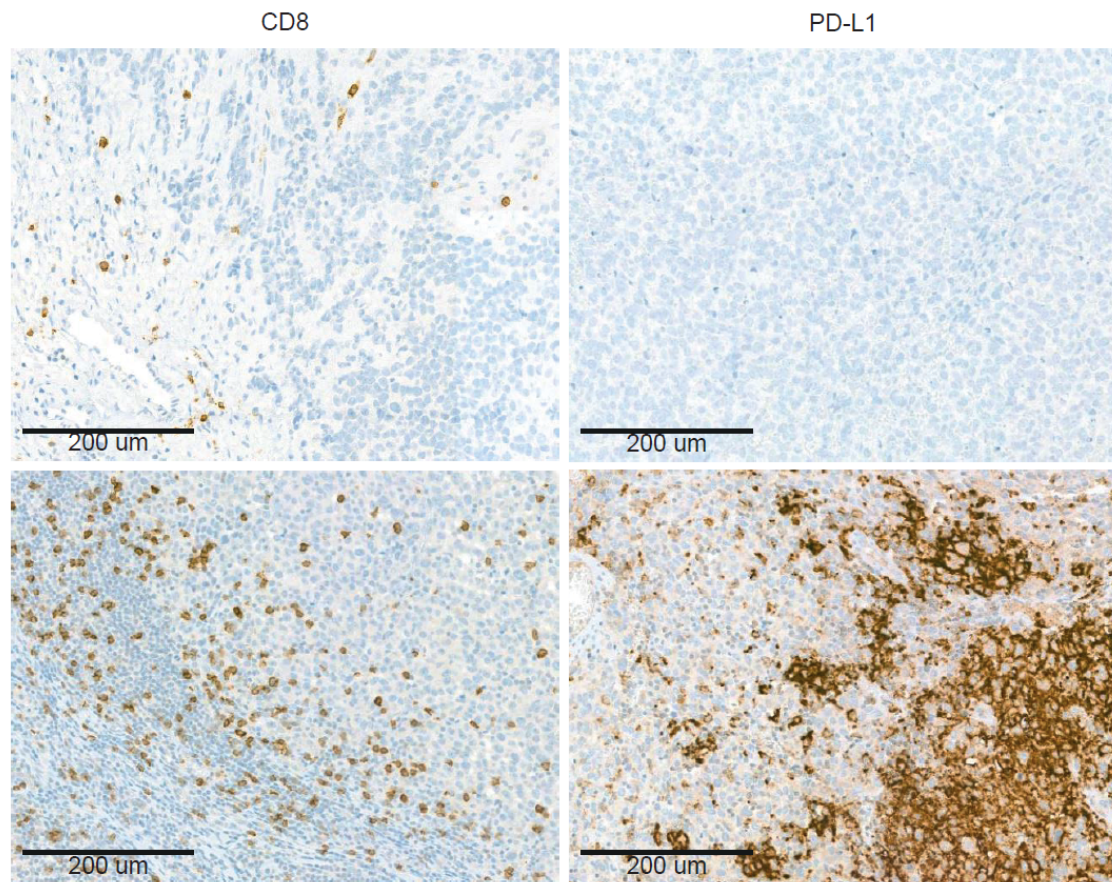

Figure S4: Examples for CD8 and PD-L1 staining. Examples for single CD8+ cells infiltrating within the tumor with moderate accumulation at the tumor margin (upper left), negative PD-L1 staining (upper right), moderate infiltration of CD8+ cells within the tumor and high accumulation at the tumor margin (lower left), and strong PD-L1 staining (lower right).

Table S1: List of genes included in the MelArray NGS panel.

|         |         |        |         |         |         |         |
|---------|---------|--------|---------|---------|---------|---------|
| ABCB5   | CCND3   | ETV6   | KMT2C   | PIK3C2A | PTPRJ   | TERF2IP |
| ACD     | CDC42   | EZH2   | KMT2D   | PIK3C3  | PTPRK   | TERT    |
| ACVR1C  | CDK4    | FAM58A | KNSTRN  | PIK3CA  | RAC1    | TNRC6B  |
| AKAP9   | CDK6    | FANCA  | KRAS    | PIK3CB  | RAD51B  | TP53    |
| AKT1    | CDKN1A  | FBXW7  | MAP2K1  | PIK3R1  | RAF1    | TRRAP   |
| AKT2    | CDKN1B  | FGFR1  | MAP2K2  | PIK3R4  | RASA1   | TSC1    |
| AKT3    | CDKN2A  | FGFR2  | MAP2K4  | PIKFYVE | RASA2   | TSC2    |
| ALK     | CDKN2C  | FGFR3  | MAP3K1  | PKD2    | RASA3   | TUSC3   |
| ANP32C  | CHD8    | FGFR4  | MAP3K2  | PLA2G6  | RB1     | TYR     |
| APC     | CTNNB1  | FYN    | MAP3K5  | PLCB1   | RET     | TYRP1   |
| ARID1A  | CXCL1   | GNA11  | MAP3K8  | PLCE1   | RICTOR  |         |
| ARID1B  | CYP1B1  | GNAI2  | MAP3K9  | PLEKHG4 | ROS1    |         |
| ARID2   | CYP7B1  | GNAQ   | MAPK1   | PMEL    | RQCD1   |         |
| ARID4B  | DCT     | GNAS   | MAPK3   | PMS2    | SETD2   |         |
| ARID5A  | DCUN1D3 | HERC2  | MC1R    | POLQ    | SF3B1   |         |
| ASIP    | DDR2    | HLA-A  | MET     | POT1    | SHOC2   |         |
| ASPM    | DDX3X   | HLA-B  | MITF    | PPARG   | SLC1A4  |         |
| ATM     | DLG1    | HLA-C  | MLH1    | PPP2R2A | SLC45A2 |         |
| AURKA   | DNMT1   | HRAS   | MLH3    | PPP2R2B | SMARCA4 |         |
| AURKB   | DNMT3A  | IDH1   | MTOR    | PPP2R5C | SMO     |         |
| BAP1    | DNMT3B  | IGF2R  | MYCN    | PPP3CA  | SOS1    |         |
| BCL2    | DPP3    | IQGAP1 | NF1     | PPP6C   | SOS2    |         |
| BCL2L12 | DYNC1I1 | ITGA5  | NFKBIE  | PRAME   | SPRED1  |         |
| BCLAF1  | E2F1    | JAK1   | NOTCH2  | PRKAR1A | SPRED2  |         |
| BRAF    | EGFR    | JAK2   | NRAS    | PRKCD   | SPRY4   |         |
| BRCA1   | EIF1AX  | JARID2 | NTRK1   | PROS1   | SRC     |         |
| BRCA2   | EIF4A1  | KDR    | OCA2    | PTCH1   | STK11   |         |
| CBL     | EP300   | KIT    | PARP1   | PTEN    | TAOK1   |         |
| CCND1   | ERBB2   | KMT2A  | PCDHGA1 | PTPN11  | TAOK2   |         |
| CCND2   | ERBB3   | KMT2B  | PDGFRA  | PTPRF   | TERF2   |         |

Table S2: Mutational profile of all tumors of patient 1 acquired by MelArray NGS panel.

**patient 1**

| <b>primary diagnosis</b>     |                     |                  |
|------------------------------|---------------------|------------------|
| <b>gene</b>                  | <b>mutation</b>     | <b>frequency</b> |
| <i>ACVR1C</i>                | p.Asn150His         | 40.1%            |
| <i>ARID5A</i>                | p.Pro375Arg         | 40.5%            |
| <i>ASPM</i>                  | p.Tyr3353His        | 50.5%            |
| <i>ASPM</i>                  | p.Gly1099AlafsTer15 | 52.8%            |
| <i>KMT2B</i>                 | p.Met390Thr         | 40.3%            |
| <i>KMT2C</i>                 | p.Gly3843Ala        | 47.4%            |
| <i>KRAS</i>                  | p.Gly12Arg          | 78.0%            |
| <i>PKD2</i>                  | p.Ser804Asn         | 51.7%            |
| <i>TERT</i>                  | p.His412Tyr         | 35.1%            |
| <b>extensive resection</b>   |                     |                  |
| <b>gene</b>                  | <b>mutation</b>     | <b>frequency</b> |
| <i>ARID5A</i>                | p.Pro375Arg         | 55.4%            |
| <i>ASPM</i>                  | p.Tyr3353His        | 64.0%            |
| <i>ASPM</i>                  | p.Gly1099AlafsTer15 | 60.8%            |
| <i>IDH1</i>                  | p.Arg132Cys         | 48.5%            |
| <i>KIT</i>                   | p.Asp816His         | 56.7%            |
| <i>KMT2B</i>                 | p.Met390Thr         | 49.9%            |
| <i>NF1</i>                   | p.Gln1315Ter        | 42.0%            |
| <i>PKD2</i>                  | p.Ser804Asn         | 51.9%            |
| <i>TERT</i>                  | p.His412Tyr         | 49.6%            |
| <b>sof tissue metastasis</b> |                     |                  |
| <b>gene</b>                  | <b>mutation</b>     | <b>frequency</b> |
| <i>ARID5A</i>                | p.Pro375Arg         | 21.6%            |
| <i>ASPM</i>                  | p.Tyr3353His        | 36.2%            |
| <i>ASPM</i>                  | p.Gly1099AlafsTer15 | 37.3%            |
| <i>KMT2B</i>                 | p.Met390Thr         | 49.8%            |
| <i>NRAS</i>                  | p.Gln61Arg          | 91.8%            |
| <i>PKD2</i>                  | p.Ser804Asn         | 47.2%            |
| <i>TERT</i>                  | p.His412Tyr         | 36.3%            |

Table S3: Mutational profile of all tumors of patient 2 acquired by MelArray NGS panel.

**patient 2**

| primary diagnosis  |                    |           |
|--------------------|--------------------|-----------|
| gene               | mutation           | frequency |
| <i>AKAP9</i>       | p.Met3743Ile       | 63.7%     |
| <i>ALK</i>         | p.Glu1400Asp       | 61.2%     |
| <i>FGFR2</i>       | p.Met671Thr        | 90.0%     |
| <i>KMT2A</i>       | p.Arg2191Gln       | 59.1%     |
| <i>KRAS</i>        | p.Gly12Ala         | 66.7%     |
| <i>PLEKHG4</i>     | p.Glu756Gly        | 35.3%     |
| local recurrence 1 |                    |           |
| gene               | mutation           | frequency |
| <i>AKAP9</i>       | p.Met3743Ile       | 50.8%     |
| <i>ALK</i>         | p.Glu1400Asp       | 51.4%     |
| <i>HERC2</i>       | p.Gly4582Glu       | 86.1%     |
| <i>KMT2A</i>       | p.Arg2191Gln       | 46.4%     |
| <i>NRAS</i>        | p.Gln61Lys         | 47.7%     |
| <i>PLEKHG4</i>     | p.Glu756Gly        | 56.4%     |
| <i>SMARCA4</i>     | p.Trp1346Cys       | 67.8%     |
| local recurrence 2 |                    |           |
| gene               | mutation           | frequency |
| <i>AKAP9</i>       | p.Met3743Ile       | 43.7%     |
| <i>ALK</i>         | p.Glu1400Asp       | 49.4%     |
| <i>ARID1B</i>      | p.Ala457GlyfsTer49 | 23.7%     |
| <i>HERC2</i>       | p.Gly4582Glu       | 29.6%     |
| <i>KMT2A</i>       | p.Arg2191Gln       | 45.8%     |
| <i>NRAS</i>        | p.Gln61Lys         | 16.7%     |
| <i>PLCB1</i>       | p.Pro813GlnfsTer5  | 13.0%     |
| <i>PLEKHG4</i>     | p.Glu756Gly        | 46.2%     |
| <i>PTPRK</i>       | p.Arg1039Ser       | 6.8%      |
| <i>SMARCA4</i>     | p.Trp1346Cys       | 53.1%     |



Table S4: Mutational profile of all tumors of patient 3 acquired by MelArray NGS panel.

| <b>patient 3</b>         |                                                        |                  |
|--------------------------|--------------------------------------------------------|------------------|
| <b>primary diagnosis</b> |                                                        |                  |
| <b>gene</b>              | <b>mutation</b>                                        | <b>frequency</b> |
| <i>BRCA2</i>             | p.Glu1120Lys                                           | 33.1%            |
| <i>GNAS</i>              | p.Asp466_Ala467insSerGlyAlaAlaArgAspAlaProAlaAspProAsp | 53.5%            |
| <i>JAK2</i>              | p.Leu579Phe                                            | 30.3%            |
| <i>KMT2A</i>             | p.Pro58ArgfsTer92                                      | 5.2%             |
| <i>KMT2C</i>             | p.Pro3367Ser                                           | 15.0%            |
| <i>MAP3K9</i>            | p.Ser909Phe                                            | 94.0%            |
| <i>MITF</i>              | p.Leu400ProfsTer24                                     | 74.3%            |
| <i>PARP1</i>             | p.His476Tyr                                            | 14.0%            |
| <i>PIK3C2A</i>           | p.Glu1028Lys                                           | 28.1%            |
| <i>PIK3C3</i>            | p.Ser128Leu                                            | 44.8%            |
| <i>PIKFYVE</i>           | p.Glu942Lys                                            | 22.9%            |
| <i>PLCE1</i>             | p.Asp1102Asn                                           | 29.2%            |
| <i>PROS1</i>             | p.Arg316Cys                                            | 47.4%            |
| <i>PTPRK</i>             | p.Glu1373Lys                                           | 46.1%            |
| <i>SLC1A4</i>            | p.Val289Met                                            | 74.1%            |
| <i>SOS1</i>              | p.Arg310Cys                                            | 23.4%            |
| <i>SOS2</i>              | p.Val680Ile                                            | 30.1%            |
| <b>LN Level III</b>      |                                                        |                  |
| <b>gene</b>              | <b>mutation</b>                                        | <b>frequency</b> |
| <i>BCL2</i>              | p.Leu185Pro                                            | 26.5%            |
| <i>BRCA2</i>             | p.Glu1120Lys                                           | 18.6%            |
| <i>GNAQ</i>              | p.Met1?                                                | 6.0%             |
| <i>GNAS</i>              | p.Asp466_Ala467insSerGlyAlaAlaArgAspAlaProAlaAspProAsp | 55.7%            |
| <i>HERC2</i>             | p.Pro339Ser                                            | 13.6%            |
| <i>JAK2</i>              | p.Leu579Phe                                            | 19.1%            |
| <i>KMT2C</i>             | p.Pro3367Ser                                           | 25.5%            |
| <i>KMT2D</i>             | p.Trp5264Cys                                           | 23.7%            |
| <i>MAP3K9</i>            | p.Ser909Phe                                            | 63.1%            |
| <i>MITF</i>              | p.Leu400ProfsTer24                                     | 72.6%            |
| <i>PARP1</i>             | p.His476Tyr                                            | 11.8%            |
| <i>PIK3C2A</i>           | p.Glu1028Lys                                           | 22.0%            |
| <i>PIK3C3</i>            | p.Ser128Leu                                            | 26.0%            |
| <i>PIKFYVE</i>           | p.Glu942Lys                                            | 22.2%            |
| <i>PLCE1</i>             | p.Asp1102Asn                                           | 22.2%            |
| <i>PROS1</i>             | p.Arg316Cys                                            | 34.6%            |
| <i>PTPRK</i>             | p.Glu1373Lys                                           | 25.0%            |
| <i>SLC1A4</i>            | p.Val289Met                                            | 59.1%            |
| <i>SOS1</i>              | p.Arg310Cys                                            | 23.0%            |
| <i>SOS2</i>              | p.Val680Ile                                            | 20.6%            |
| <b>Hemicolectomy</b>     |                                                        |                  |
| <b>gene</b>              | <b>mutation</b>                                        | <b>frequency</b> |
| <i>BRCA2</i>             | p.Glu1120Lys                                           | 34.7%            |
| <i>JAK2</i>              | p.Leu579Phe                                            | 30.0%            |
| <i>KMT2C</i>             | p.Pro3367Ser                                           | 21.1%            |
| <i>MAP3K9</i>            | p.Ser909Phe                                            | 87.7%            |
| <i>MITF</i>              | p.Leu400ProfsTer24                                     | 82.7%            |
| <i>PARP1</i>             | p.His476Tyr                                            | 19.3%            |

|                                 |                                                        |                  |
|---------------------------------|--------------------------------------------------------|------------------|
| <i>PIK3C2A</i>                  | p.Glu1028Lys                                           | 32.5%            |
| <i>PIK3C3</i>                   | p.Ser128Leu                                            | 37.4%            |
| <i>PIK3CA</i>                   | p.Cys420Arg                                            | 20.2%            |
| <i>PIKFYVE</i>                  | p.Glu942Lys                                            | 23.2%            |
| <i>PLCE1</i>                    | p.Asp1102Asn                                           | 32.9%            |
| <i>PROS1</i>                    | p.Arg316Cys                                            | 43.6%            |
| <i>PTPRJ</i>                    | c.2153-2A>C                                            | 33.5%            |
| <i>PTPRK</i>                    | p.Glu1373Lys                                           | 32.5%            |
| <i>ROS1</i>                     | c.5249-8C>T                                            | 80.5%            |
| <i>SOS1</i>                     | p.Arg310Cys                                            | 26.0%            |
| <i>SOS2</i>                     | p.Val680Ile                                            | 37.2%            |
| <b>Adrenal gland metastasis</b> |                                                        |                  |
| <b>gene</b>                     | <b>mutation</b>                                        | <b>frequency</b> |
| <i>BCL2</i>                     | p.Leu185Pro                                            | 37.8%            |
| <i>BCLAF1</i>                   | p.Arg47Cys                                             | 6.9%             |
| <i>BCLAF1</i>                   | c.-10-5_-10-4insCTTC                                   | 8.4%             |
| <i>BRCA2</i>                    | p.Glu1120Lys                                           | 22.3%            |
| <i>GNAQ</i>                     | p.Met1?                                                | 5.3%             |
| <i>GNAS</i>                     | p.Asp466_Ala467insSerGlyAlaAlaArgAspAlaProAlaAspProAsp | 33.2%            |
| <i>KMT2C</i>                    | p.Pro3367Ser                                           | 20.1%            |
| <i>KMT2D</i>                    | p.Trp5264Cys                                           | 25.7%            |
| <i>MAP3K9</i>                   | p.Ser909Phe                                            | 83.3%            |
| <i>MITF</i>                     | p.Leu400ProfsTer24                                     | 94.6%            |
| <i>NRAS</i>                     | p.Gln61Lys                                             | 12.3%            |
| <i>PARP1</i>                    | p.His476Tyr                                            | 13.5%            |
| <i>PIK3C2A</i>                  | p.Glu1028Lys                                           | 52.9%            |
| <i>PIK3C3</i>                   | p.Ser128Leu                                            | 35.1%            |
| <i>PIKFYVE</i>                  | p.Glu942Lys                                            | 20.8%            |
| <i>PLCE1</i>                    | p.Asp1102Asn                                           | 25.0%            |
| <i>PROS1</i>                    | p.Arg316Cys                                            | 43.0%            |
| <i>PTPRK</i>                    | p.Glu1373Lys                                           | 42.5%            |
| <i>ROS1</i>                     | c.5249-8C>T                                            | 78.9%            |
| <i>SLC1A4</i>                   | p.Val289Met                                            | 69.4%            |
| <i>SOS1</i>                     | p.Arg310Cys                                            | 20.8%            |
| <i>SOS2</i>                     | p.Val680Ile                                            | 21.9%            |

Table S5: Mutational analysis of sinonasal melanoma before and after immunotherapy

|                  | Before RT                                                                        | After RT                                                                                                    |
|------------------|----------------------------------------------------------------------------------|-------------------------------------------------------------------------------------------------------------|
| <b>RT-pat. 1</b> | wild type for <i>KRAS</i> , <i>NRAS</i> , <i>KIT</i><br><i>PTEN</i> p.V166Sfs*14 | wild type for <i>KRAS</i> , <i>NRAS</i> , <i>KIT</i><br><i>PTEN</i> p.V166Sfs*14, <i>BRCA2</i> p.T2125Nfs*4 |
| <b>RT-pat. 2</b> | wild type for <i>KRAS</i> , <i>NRAS</i> , <i>KIT</i><br><i>TP53</i> p.R273C      | wild type for <i>KRAS</i> , <i>NRAS</i> , <i>KIT</i><br><i>TP53</i> p.R273C                                 |
| <b>RT-pat. 3</b> | wild type for <i>BRAF</i> , <i>NRAS</i> , <i>KIT</i>                             | wild type for <i>BRAF</i> , <i>NRAS</i> , <i>KIT</i>                                                        |

RT = radio therapy

Table S6: Distribution of CD8+ cells and PD-L1 status in all assessed tumors.

|                  | sample                   | mutation           | CD8                                                  | PD-L1    |
|------------------|--------------------------|--------------------|------------------------------------------------------|----------|
| <b>patient 1</b> | primary diagnosis        | <i>KRAS</i> p.G12R | central negative, peripherally moderate              | TC0, IC1 |
|                  | extensive resection      | <i>KIT</i> p.D916H | central negative, peripherally single positive cells | TC0, IC0 |
|                  | sof tissue metastasis    | <i>NRAS</i> p.Q61R | central moderate, peripherally moderate              | TC0, IC1 |
| <b>patient 2</b> | primary diagnosis        | <i>KRAS</i> p.G12A | central single pos cells, peripheral modeate         | TC0, IC0 |
|                  | local recurrence 1       | <i>NRAS</i> p.Q61K | central moderate, peripheral high                    | TC0, IC1 |
| <b>patient 3</b> | primary diagnosis        | WT                 | central single pos cells, peripheral modeate         | TC0, IC0 |
|                  | LN Level III             | WT                 | central moderate, peripheral high                    | TC2, IC2 |
|                  | Adrenal gland metastasis | <i>NRAS</i> p.Q61K | central single pos cells, peripheral modeate         | TC2, IC3 |

Table S7: Mutational burden of all samples as calculated by MelArray

|                  |                          | number of mutations | mutations / Mb |
|------------------|--------------------------|---------------------|----------------|
| <b>patient 1</b> | primary diagnosis        | 9                   | 13.8           |
|                  | extensive resection      | 9                   | 13.8           |
|                  | sof tissue metastasis    | 7                   | 10.8           |
| <b>patient 2</b> | primary diagnosis        | 6                   | 9.2            |
|                  | local recurrence 1       | 7                   | 10.8           |
|                  | local recurrence 2       | 10                  | 15.4           |
| <b>patient 3</b> | primary diagnosis        | 17                  | 26.2           |
|                  | LN Level III             | 20                  | 30.8           |
|                  | Hemicolectomy            | 15                  | 23.1           |
|                  | Adrenal gland metastasis | 20                  | 30.8           |
